# Supplementary material for: Molecular ruthenium complexes anchored on magnetic nanoparticles that act as powerful and magnetically recyclable stereospecific epoxidation catalysts
Source: Royal Society of Chemistry journal article supplement (doi:10.1039/c2cy20616a), 2012-11-06
Supplement: c2cy20616a.pdf [file c2cy20616a.pdf]

SUPPORTING INFORMATION

**MOLECULAR RUTHENIUM COMPLEXES ANCHORED ON MAGNETIC NANOPARTICLES  
THAT ACT AS POWERFUL AND MAGNETICALLY RECYCLABLE STEREOSPECIFIC  
EPOXIDATION CATALYSTS**

LYDIA VAQUER,<sup>A</sup> PAOLA RIENTE,<sup>A</sup> XAVIER SALA,<sup>B</sup> SUSANNA JANSAT<sup>C</sup>, JORDI BENET-  
BUCHHOLZ,<sup>A</sup> ANTONI LLOBET,<sup>\*,A,B</sup> MIQUEL A. PERICÀS.<sup>\*,A,C</sup>

<sup>a</sup> Institute of Chemical Research of Catalonia, Av. Països Catalans, 16, 43007 Tarragona, Spain.

<sup>b</sup> Departament de Química, Universitat Autònoma de Barcelona, Cerdanyola del Vallès, E-08193 Barcelona, Spain

<sup>c</sup> Departament de Química Orgànica, Universitat de Barcelona, c/ Martí I Franqués 1-11, 08080, Barcelona, Spain.

E-mail: [mapericas@iciq.es](mailto:mapericas@iciq.es), [allobet@iciq.es](mailto:allobet@iciq.es)

## Contents

|                                                                              |     |
|------------------------------------------------------------------------------|-----|
| Drawing and labeling of <b>3a</b> and <i>trans</i> - <b>3b</b>               | S3  |
| Maldi-TOF of <b>2</b>                                                        | S3  |
| CV of <b>2</b> in DCM                                                        | S4  |
| CV of <b>3a</b> and <i>trans</i> - <b>3b</b> in DCM                          | S5  |
| CV of <b>3a</b> in H <sub>2</sub> O                                          | S5  |
| UV-Vis spectra of <b>3a</b>                                                  | S6  |
| IR spectrum of MNPs, <b>4a</b> and <b>6a</b> .                               | S6  |
| IR spectrum of MNPs, <i>trans</i> - <b>4b</b> and <i>trans</i> - <b>6b</b> . | S6  |
| TEM micrograph of <b>7a</b> after second catalytic run.                      | S7  |
| X-Ray Crystal Structure Determination                                        | S8  |
| NMR characterization                                                         | S10 |

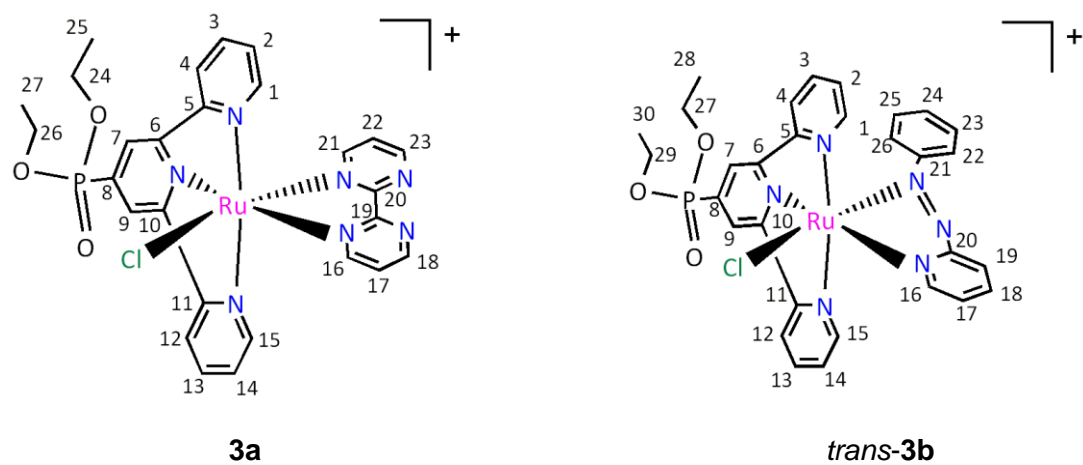

Figure S1

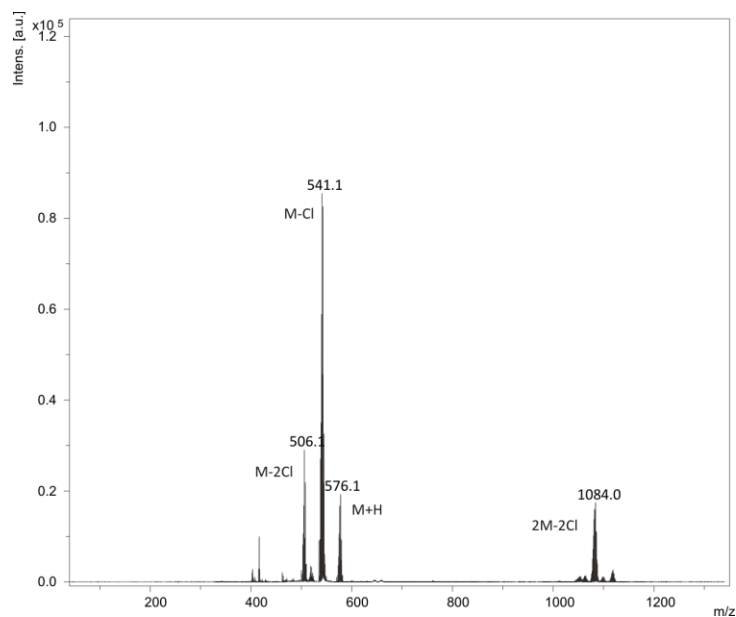

Figure S2. Maldi-TOF of 2

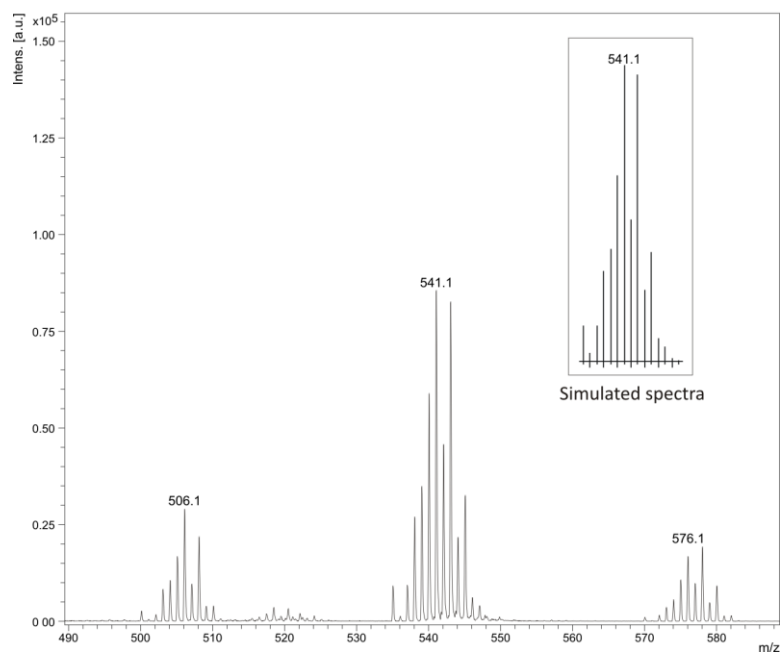

**Figure S3.** Zoom of Maldi-TOF of **2** and simulated spectra.

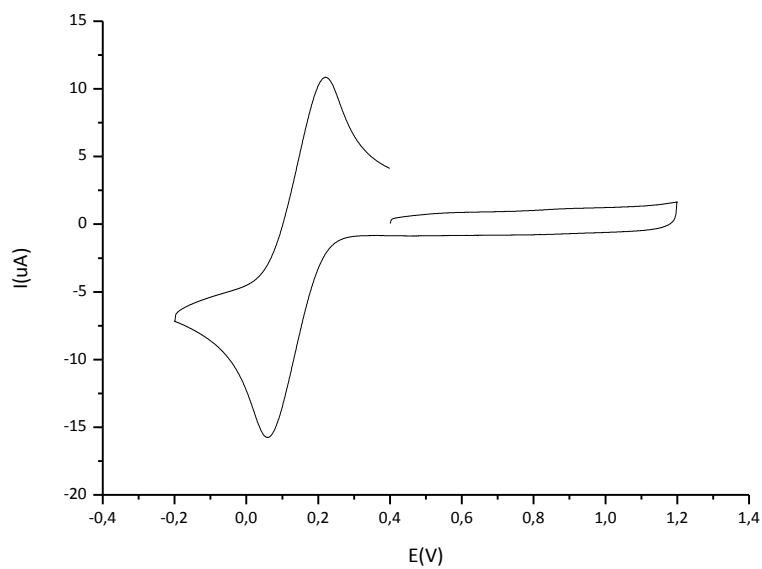

**Figure S4.** CV of **2** in  $\text{CH}_2\text{Cl}_2$  (TBAH).

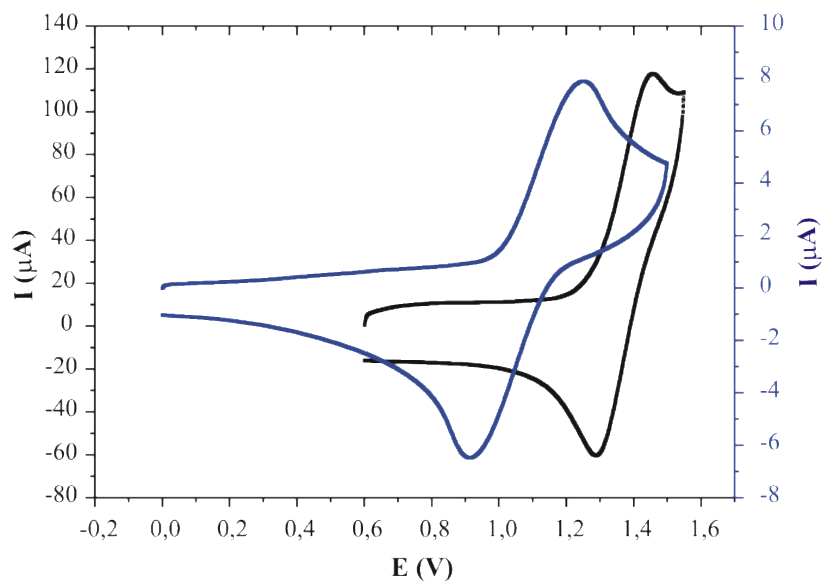

**Figure S5.** CV of **3a** (blue) and *trans*-**3b** (black) in CH<sub>2</sub>Cl<sub>2</sub> (TBAH).

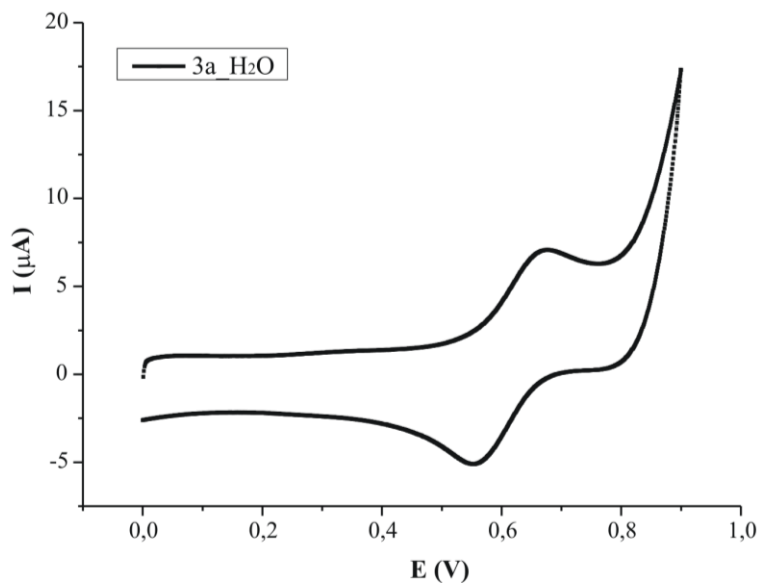

**Figure S6.** CV of **3a** in H<sub>2</sub>O (pH 7).

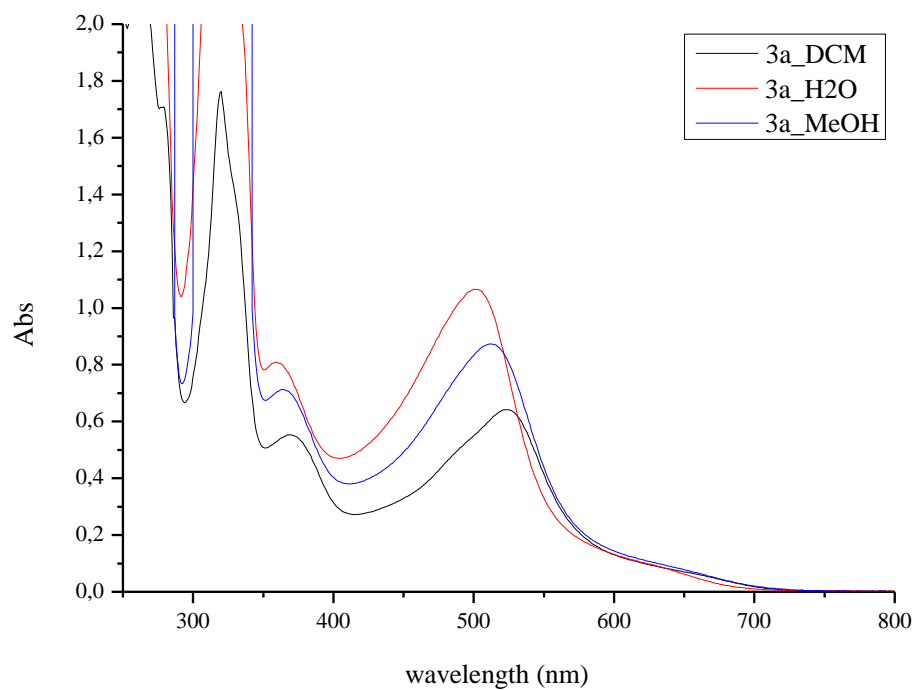

**Figure S7.** UV-Vis spectra of **3a** in H<sub>2</sub>O (red), MeOH (blue) and DCM (black).

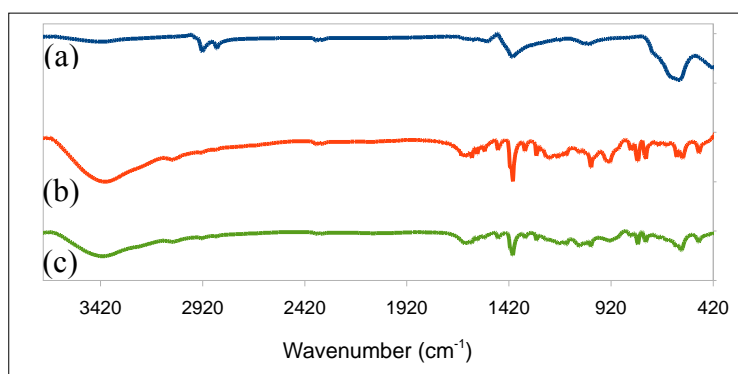

**Figure S8.** IR spectrum of (a) MNPs, (b) **4a** and (c) **6a**.

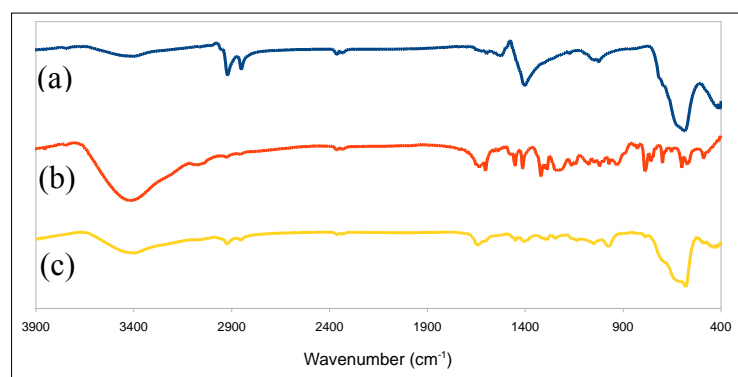

**Figure S9.** IR spectrum of (a) MNPs, (b) *trans*-**4b** and (c) *trans*-**6b**.

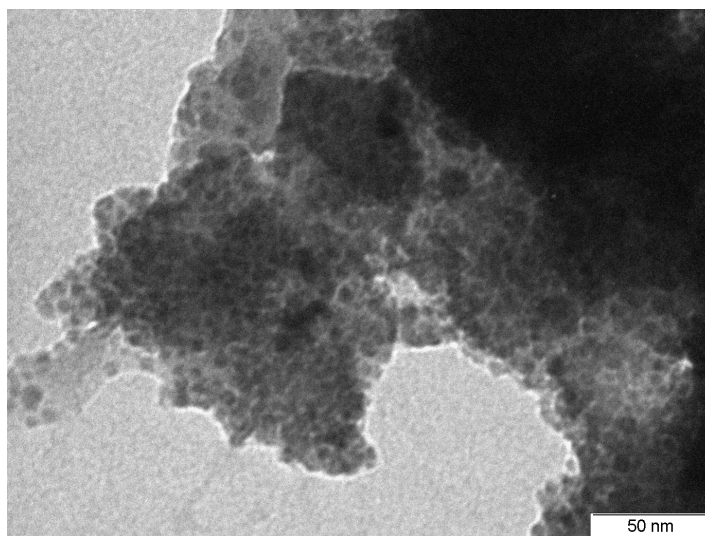

**Figure S10.** TEM micrograph of **7a** after second catalytic run.

## X-Ray Crystal Structure Determination

Crystals of *cis-3b* and *trans-3b* were obtained by slow diffusion of diethyl ether over a solution of complex in dichloromethane. The measured crystals were prepared under inert conditions immersed in perfluoropolyether as protecting oil for manipulation.

**Data collection:** Crystal structure determinations were carried out using a Bruker-Nonius diffractometer equipped with an APEX 2 4K CCD area detector, a FR591 rotating anode with MoK $\alpha$  radiation, Montel mirrors as monochromator and a Oxford Cryosystem plus low temperature device (T = -173 °C). Full-sphere data collection was used with  $\omega$  and  $\phi$  scans. Programs used: Data collection APEX-2<sup>1</sup>, data reduction Bruker Saint<sup>2</sup> V/.60A and absorption correction SADABS<sup>3</sup>.

**Structure Solution and Refinement:** Crystal structure solution was achieved using direct methods as implemented in SHELXTL<sup>4</sup> and visualized using the program XP. Missing atoms were subsequently located from difference Fourier synthesis and added to the atom list. Least-squares refinement on F<sup>2</sup> using all measured intensities was carried out using the program SHELXTL. All non-hydrogen atoms were refined including anisotropic displacement parameters.

Compound *cis-3b*: The asymmetric unit is made up by one molecule of the complex, one PF<sub>6</sub> anion and a half molecule of dichloromethane. The dichloromethane molecule is disordered in two + two positions located around a C2 rotation axes (25:25:25:25). The dichloromethane molecule is shared with the neighboring asymmetric unit. The phosphorous rest of the main molecule is disordered in two orientations (ratio 92:08). Compound *trans-3b*: The asymmetric unit is made up by one molecule of the complex, one PF<sub>6</sub> anion, a half dichloromethane molecule and a quarter of water molecule. The phosphorous rest of the main molecule is disordered in two orientations (ratio 52:48). Also the PF<sub>6</sub> anion is disordered in two orientations (ratio 77:33). The dichloromethane molecule is disordered over an inversion center. In the region of the water molecule only the electron density corresponding to a quarter of water could be localized.

**Crystal data for *cis-3b* at 100 K:** C<sub>30</sub>H<sub>29</sub>Cl<sub>1</sub>N<sub>6</sub>O<sub>3</sub>P<sub>1</sub>Ru<sub>1</sub> + 1/2 CH<sub>2</sub>Cl<sub>2</sub> + PF<sub>6</sub><sup>-</sup>, 876.52 g mol<sup>-1</sup>, Monoclinic, C2/c, a = 29.0844(10) Å, b = 15.0420(5) Å, c = 16.3344(6) Å,  $\alpha$  = 90°,  $\beta$  = 108.315(2)°,  $\gamma$  = 90°, V = 6784.1(4) Å<sup>3</sup>, Z = 8,  $\rho_{\text{calc}}$  = 1.716 Mg/m<sup>3</sup>, R<sub>1obs</sub> = 0.0349 (R<sub>1ref</sub> = 0.0471), wR<sub>2obs</sub> = 0.798 (wR<sub>2ref</sub> = 0.0858), for 8505 reflections with I > 2 $\sigma$ (I) (for 10257 reflections [R<sub>int</sub>: 0.0533] with a total of 45833 reflections measured), diffracting 2theta range: 1.54° to 30.78°, goodness-of-fit on F<sup>2</sup> = 1.026, largest diff. peak (hole) = 1.024 (-0.724) e Å<sup>-3</sup>.

**Crystal data for *trans-3b* at 100 K:** C<sub>30</sub>H<sub>29</sub>Cl<sub>1</sub>N<sub>6</sub>O<sub>3</sub>P<sub>1</sub>Ru<sub>1</sub> + 1/2 CH<sub>2</sub>Cl<sub>2</sub> + PF<sub>6</sub><sup>-</sup> + 1/4 H<sub>2</sub>O, 881.02 g mol<sup>-1</sup>, Triclinic, P-1, a = 10.9643(7) Å, b = 11.9921(8) Å, c = 15.4910(15) Å,  $\alpha$  = 110.491(5)°,  $\beta$  = 99.026(4)°,  $\gamma$  = 107.666(3)°, V = 1737.2(2) Å<sup>3</sup>, Z = 2,  $\rho_{\text{calc}}$  = 1.684 Mg/m<sup>3</sup>, R<sub>1obs</sub> = 0.0502 (R<sub>1ref</sub> = 0.0622), wR<sub>2obs</sub> = 0.1284 (wR<sub>2ref</sub> = 0.1367), for 8446 reflections with I > 2 $\sigma$ (I) (for 10105 reflections [R<sub>int</sub>: 0.0543] with a total measured of 29332 reflections), diffracting 2theta range: 1.47° to 30.78°, goodness-of-fit on F<sup>2</sup> = 1.028, largest diff. peak (hole) = 2.090 (-1.373) e Å<sup>-3</sup>.

CCDC numbers for *cis-3b* and *trans-3b* are 896921 & 896922 respectively

<sup>1</sup> Data collection with APEX II versions v1.0-22, v2009.1-0 and v2009.1-02. Bruker (2007). Bruker AXS Inc., Madison, Wisconsin, USA.

<sup>2</sup> Data reduction with Bruker SAINT versions V.2.10(2003), V/.60A and V7.60A. Bruker (2007). Bruker AXS Inc., Madison, Wisconsin, USA.

<sup>3</sup> SADABS: V.2.10(2003); V2008 and V2008/1 Bruker (2001). Bruker AXS Inc., Madison, Wisconsin, USA. Blessing, Acta Cryst. (1995) A51 33-38.

<sup>4</sup> Sheldrick, G.M. Acta Cryst. 2008 A64, 112-122. SHELXTL versions V6.12 and 6.14.

## NMR CHARACTERIZATION

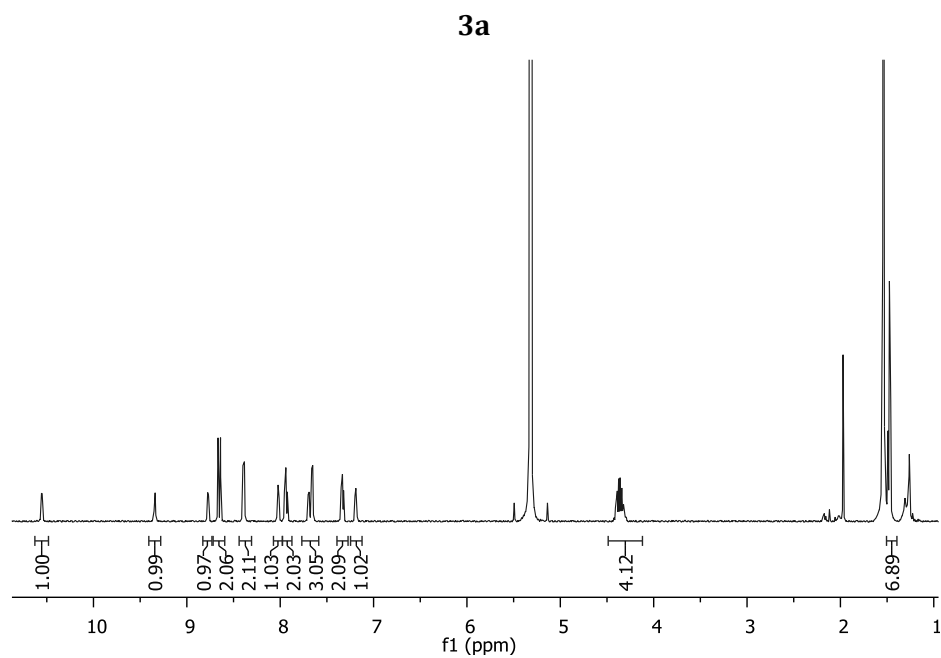

**Figure S11.**  $^1\text{H}$ -NMR of **3a**.

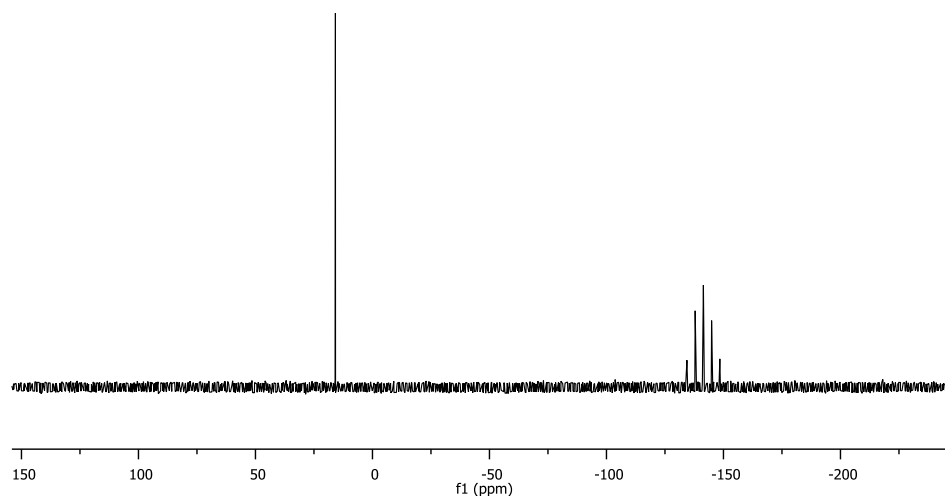

**Figure S12.**  $^{31}\text{P}$ -NMR of **3a**.

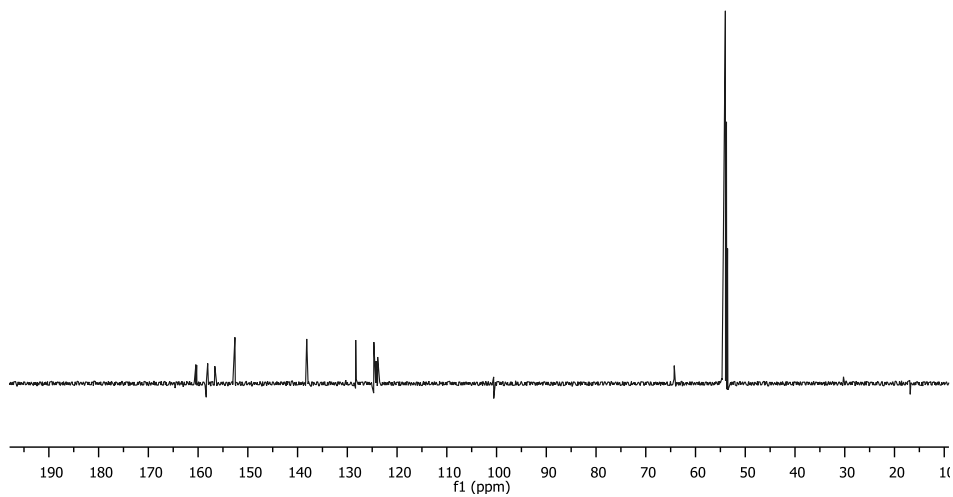

**Figure S13.**  $^{13}\text{C}$ -NMR of 3a.

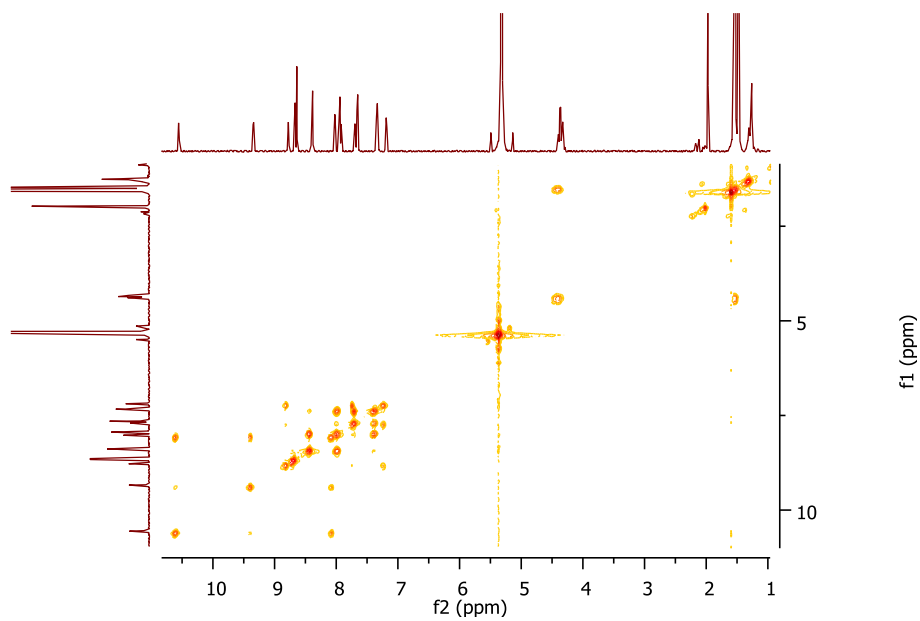

**Figure S14.** COSY of 3a.

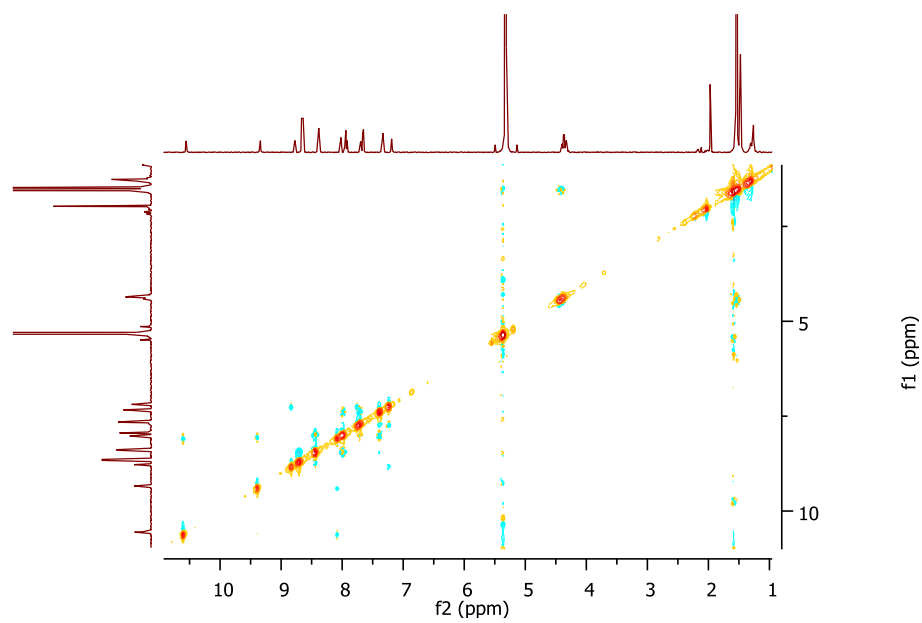

**Figure S15. NOESY of 3a.**

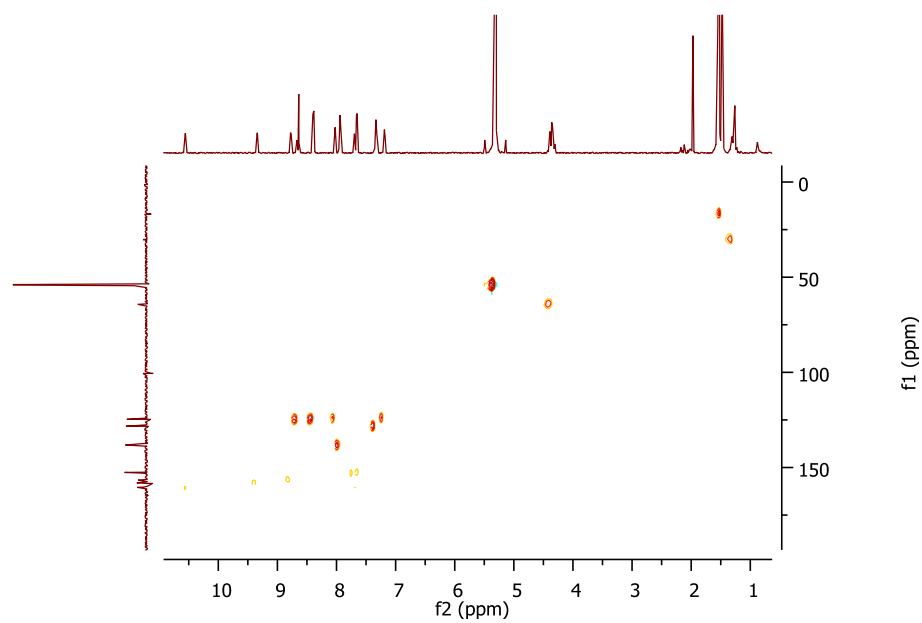

**Figure S16. HMQC of 3a.**

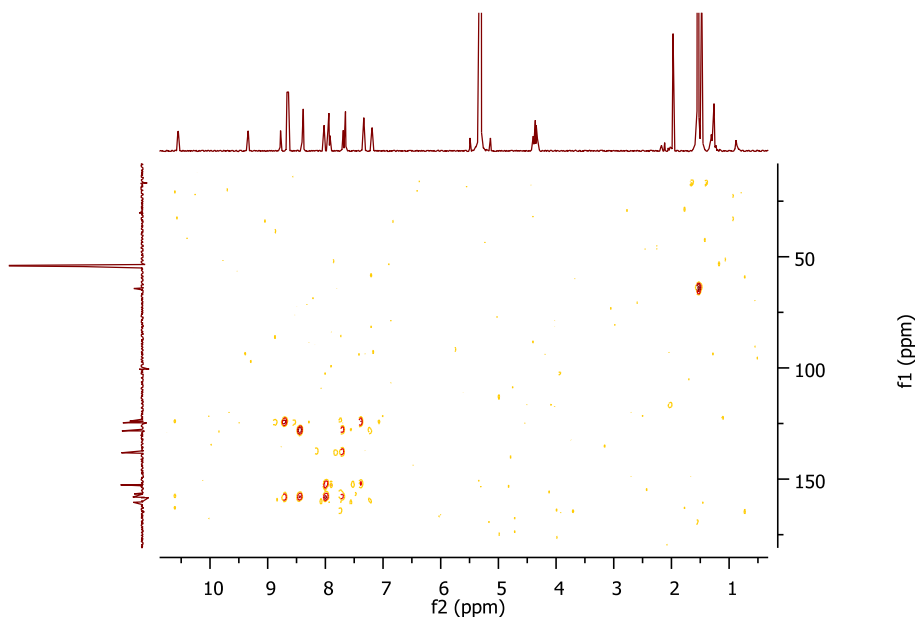

**Figure S17.** HMBC of **3a**.

***Trans-3b***

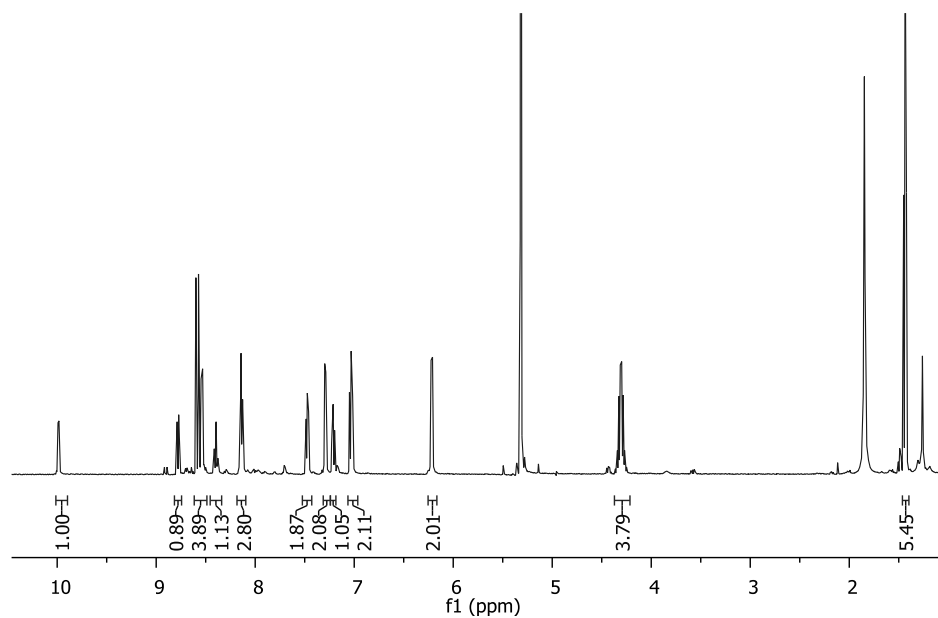

**Figure S18.** <sup>1</sup>H-NMR of *trans-3b*.

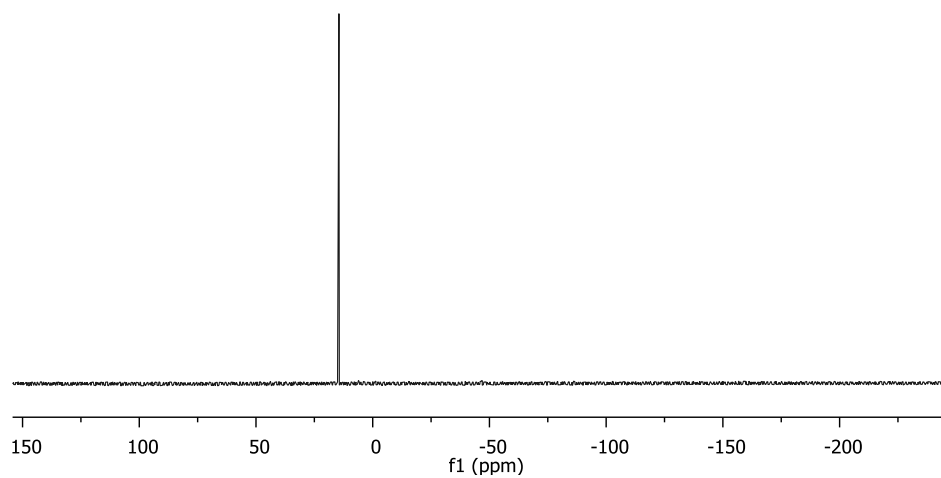

**Figure S19.** <sup>31</sup>P-NMR of *trans-3b*

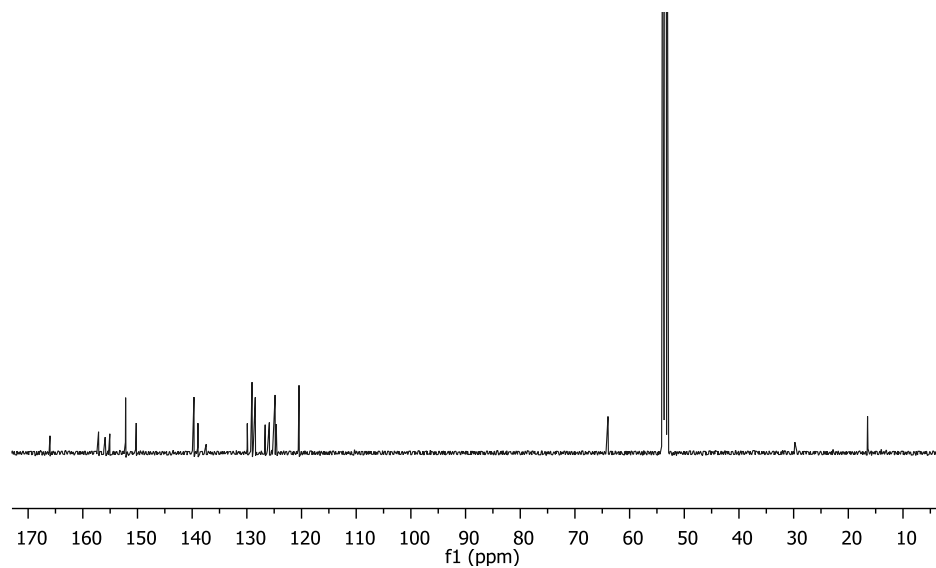

**Figure S20.**  $^{13}\text{C}$ -NMR of *trans*-3b.

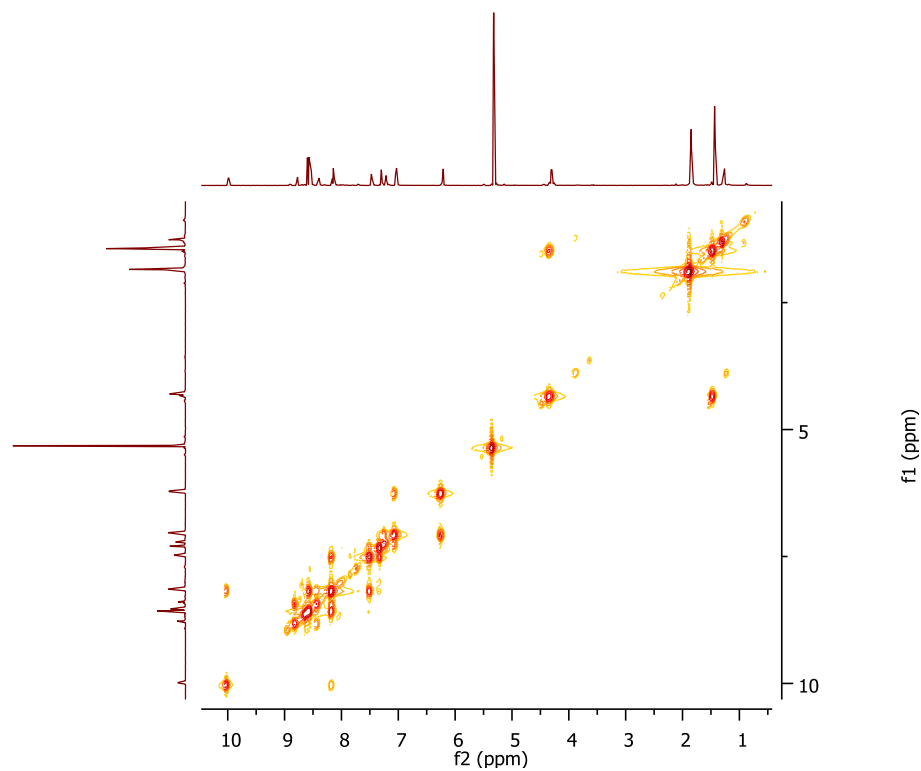

**Figure S21.** COSY of *trans*-3b.

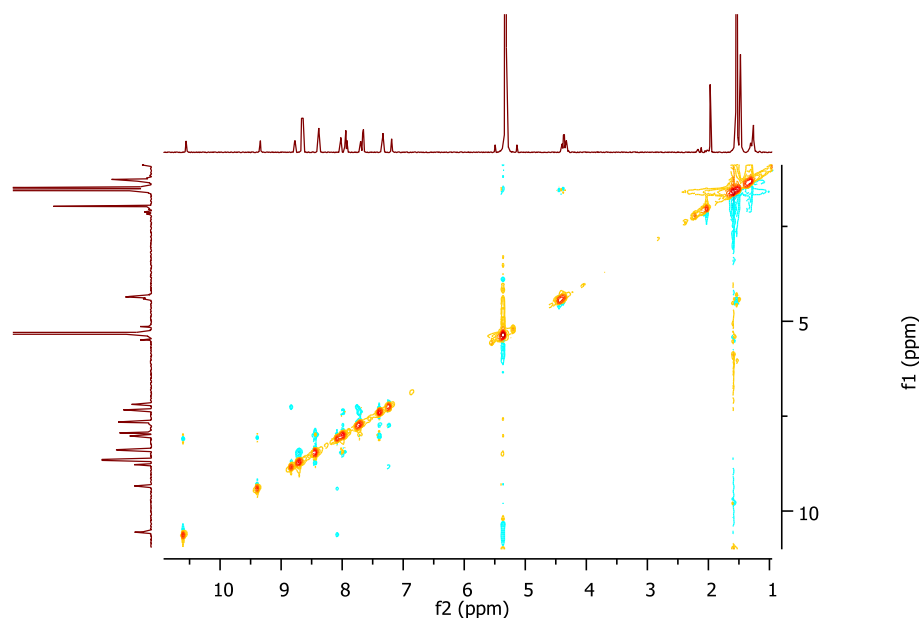

Figure S22. NOESY of *trans*-3b.

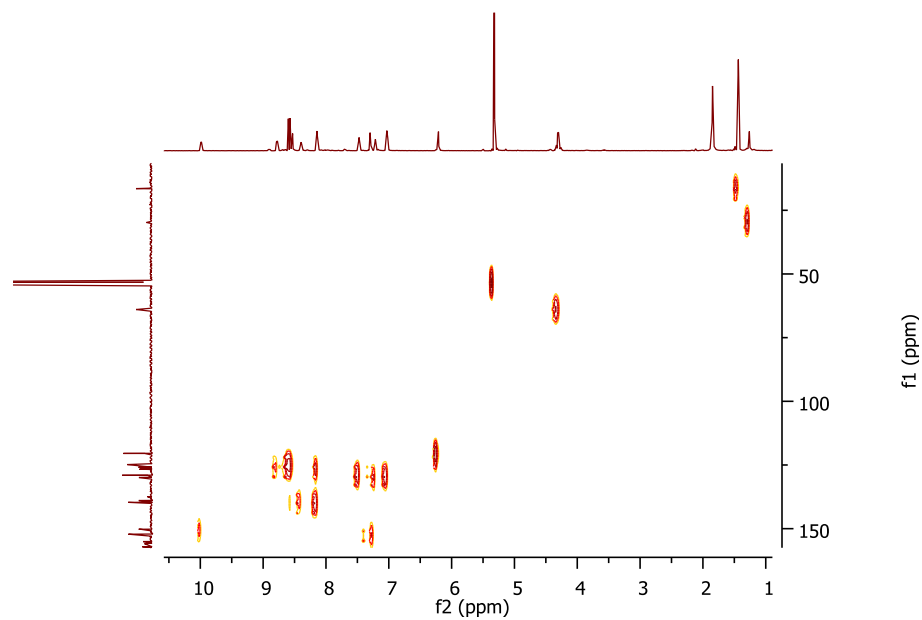

Figure S23. HMQC of *trans*-3b.

Ç

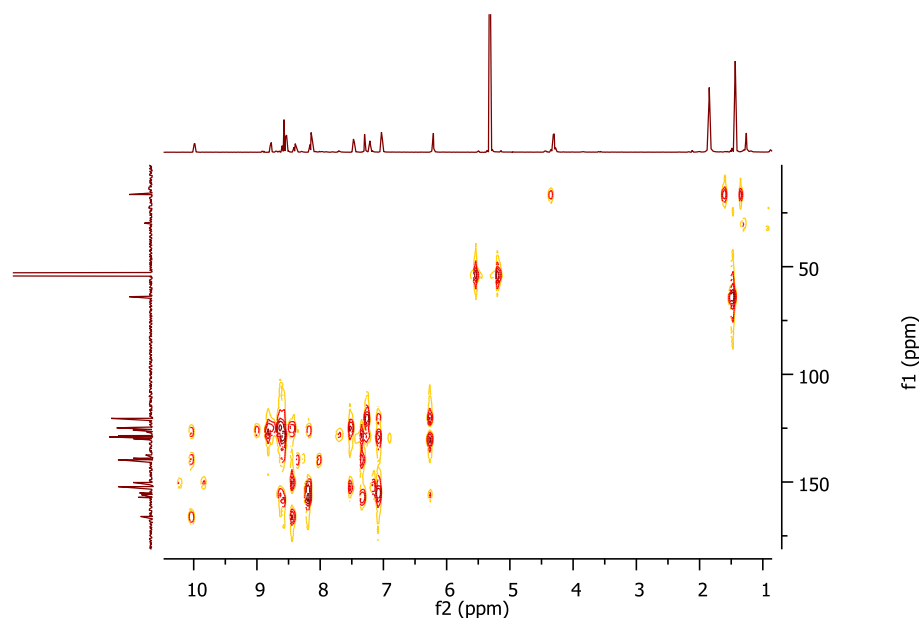

**Figure S24.** HMBC of *trans*-**3b**.

**3b**-mixture of isomers

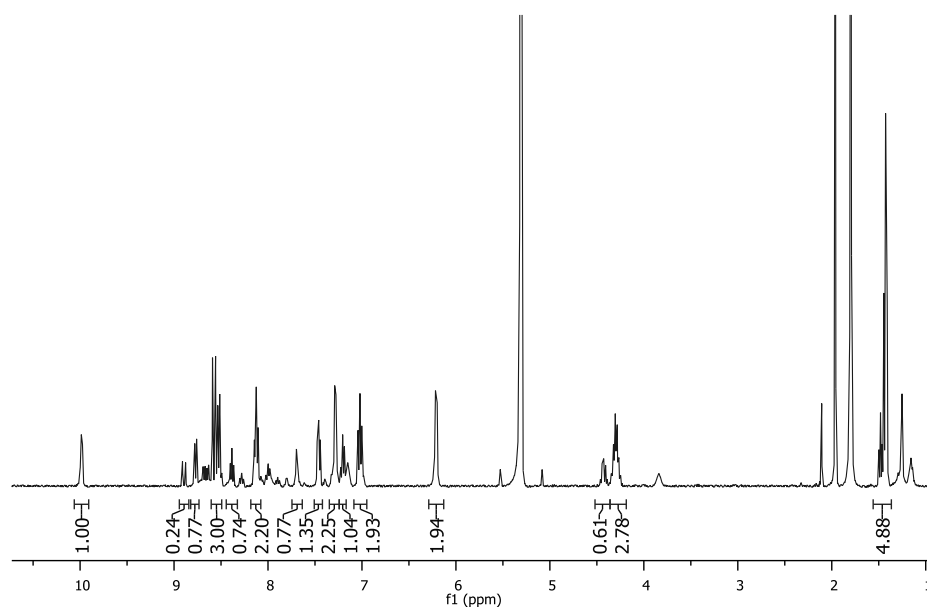

**Figure S25.**  $^1\text{H}$ -NMR of the mixture of isomers of **3b**.

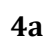

**Figure S26.**  $^1\text{H}$ -NMR of **4a**.

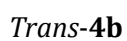

**Figure S27.**  $^1\text{H}$ -NMR of *trans*-4b.
